# Supplementary material
Source: publisher figshare collection journal article supplement (https://acs.figshare.com/ndownloader/files/3832744)
Supplement: Supplementary file 1 [file 3832744]

# SUPPORTING INFORMATION

## Pulmonary Insulin-like Growth Factor I Delivery from Trehalose and Silk-Fibroin Microparticles

*Isabel Schultz, Frederic Vollmers, Tessa Lühmann, Jens-Christoph Rybak, Ronja Wittmann<sup>1</sup>,  
Katharina Stank<sup>1</sup>, Hartwig Steckel<sup>1</sup>, Boris Kardziej<sup>2</sup>, Michael Schmidt<sup>3</sup>,  
Petra Högger, Lorenz Meinel\**

Institute for Pharmacy and Food Chemistry, University of Wuerzburg, Am Hubland, DE-97074  
Wuerzburg, Germany; <sup>1</sup>Institute for Pharmacy, University of Kiel, Grasweg 9a, DE-24118 Kiel;  
<sup>2</sup>Thoraxzentrum Bezirk Unterfranken, DE-97702 Muennerstadt, Germany; <sup>3</sup>Medical Clinic and  
Polyclinic I, University of Wuerzburg, DE-97080 Wuerzburg, Germany

Number of pages: 5 (S1-S4).

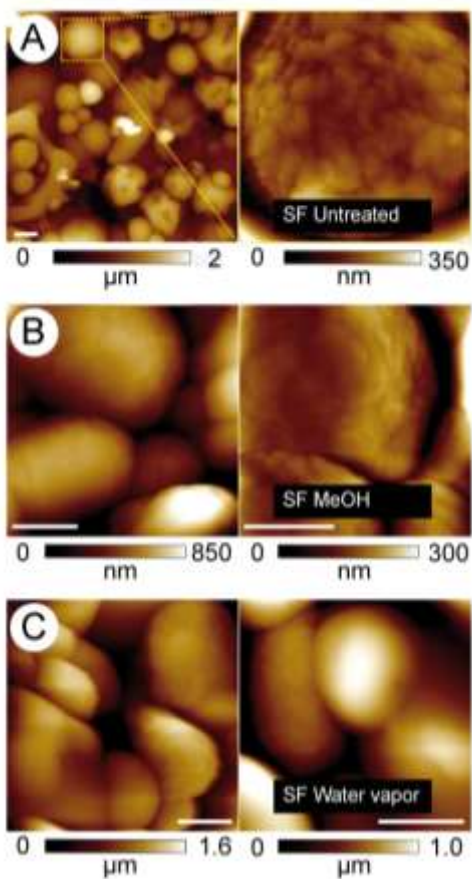

**Figure S1.** AFM images of (A) untreated SF microparticles (left) with respective magnification (right), (B) methanol-treated SF and (C) water vapor-exposed SF microparticles. Color bars represent the surface roughness. Bar length is 1 μm.

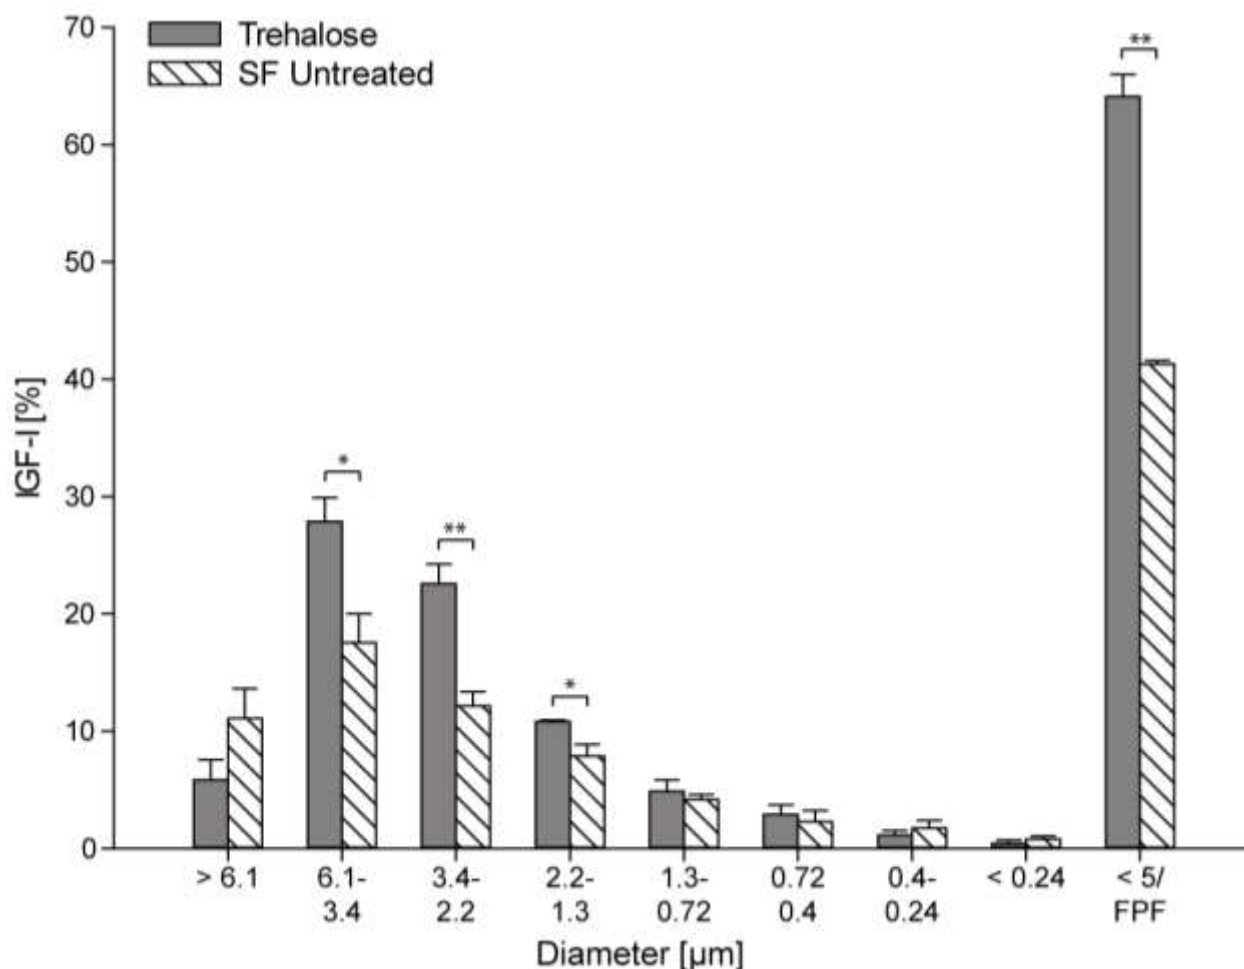

**Figure S2.** Distribution of IGF-I [%] on the different stages of the Next Generation Impactor after aerosolization of trehalose and untreated silk-fibroin microparticles (mean  $\pm$  standard deviation;  $n=3$ ). Asterisks highlight significant difference at  $p < 0.05$  for stage 2 (6.1  $\mu\text{m}$ –3.4  $\mu\text{m}$ ) and 4 (2.2  $\mu\text{m}$ –1.3  $\mu\text{m}$ ) and two asterisks at  $p < 0.01$  for stage 3 (3.4  $\mu\text{m}$ –2.2  $\mu\text{m}$ ) and the FPF (fine particle fraction) of all microparticles. FPF is the sum of particles with a diameter  $\leq 5$   $\mu\text{m}$ .

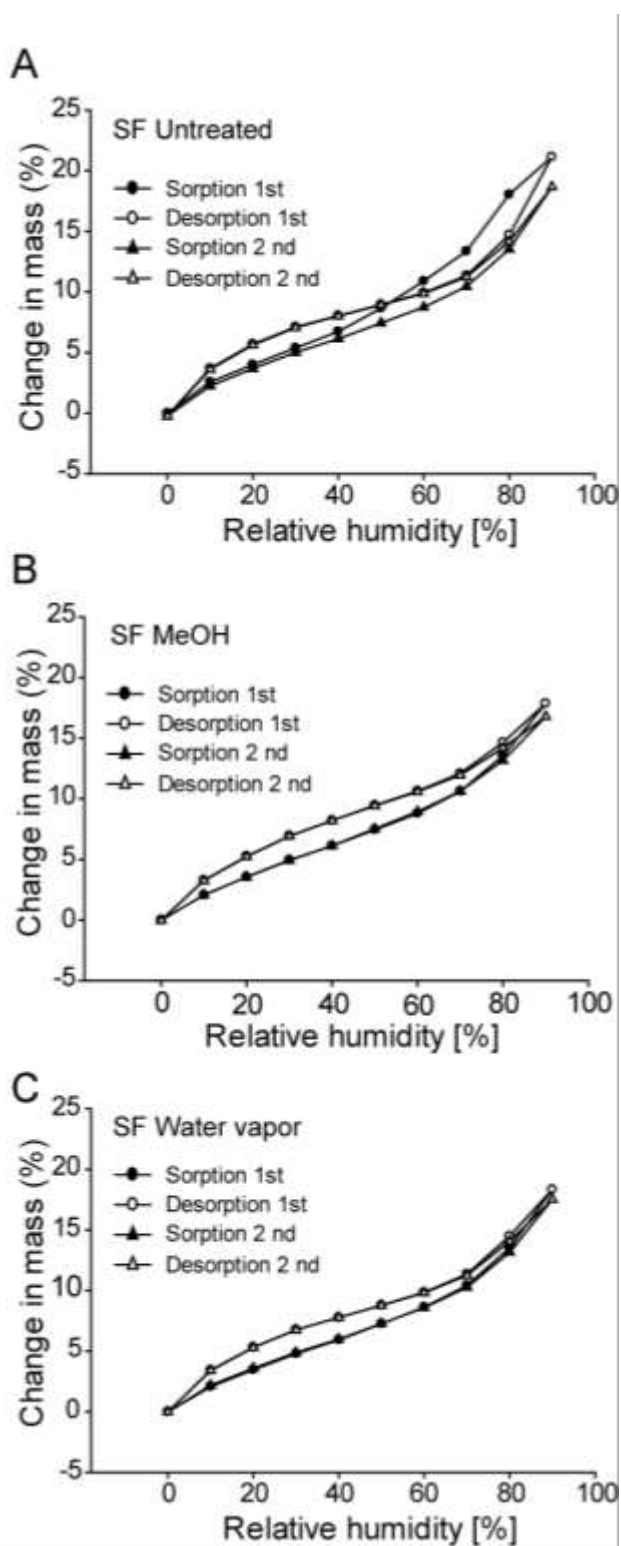

**Figure S3.** Water vapor isotherms of (A) untreated, (B) methanol-treated, and (C) water vapor-exposed microparticles.

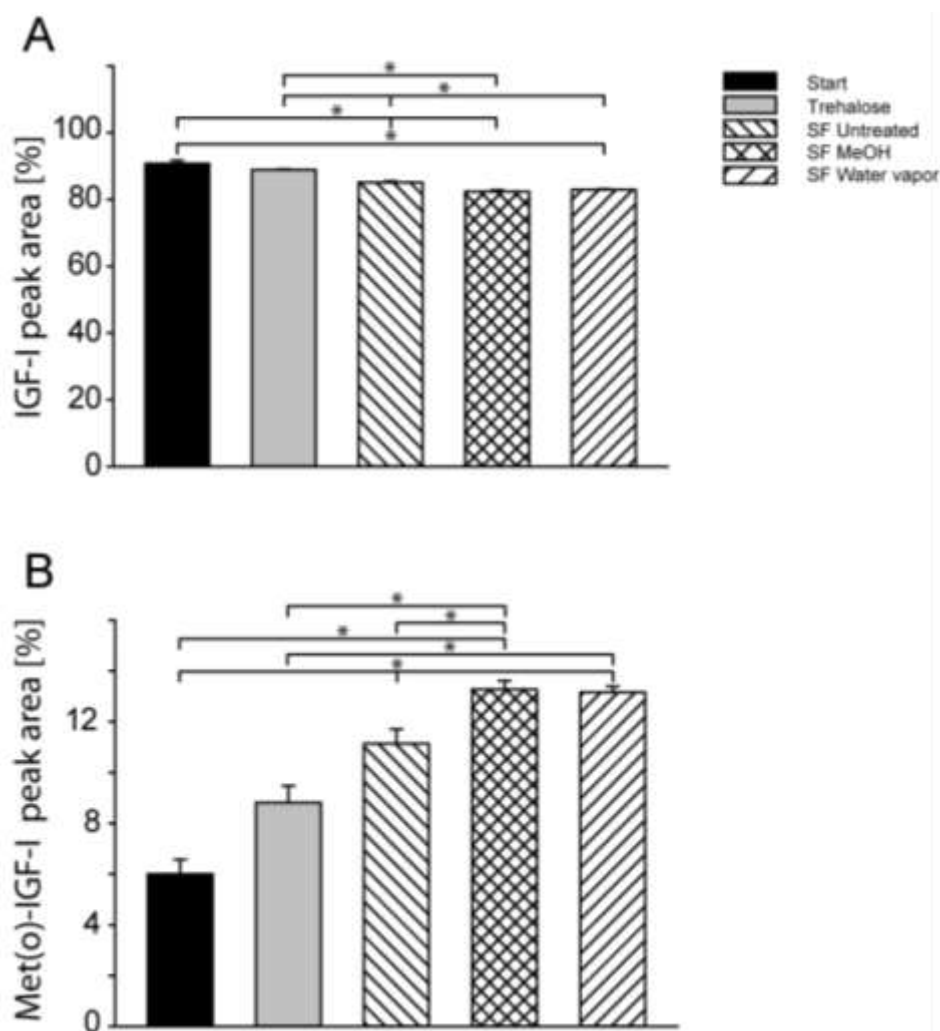

**Figure S4.** IGF-I degradation analysis: (A) IGF-I peak area [%] before spray drying (start) and of IGF-I released from trehalose, untreated, methanol-treated and water vapor-exposed microparticles. (B) Peak area [%] of methionine 59 oxidized IGF-I (Met(o)-IGF-I) from samples collected before spray drying (start) and from trehalose, untreated, methanol-treated and water vapor-exposed microparticles. Asterisks highlight significant difference ( $p < 0.05$ ).
